# Supplementary material for: Deep learning-based prediction of major arrhythmic events in dilated cardiomyopathy: A proof of concept study
Source: PubMed Central journal article supplement (PMC10903812; doi:10.1371/journal.pone.0297793), 2024-02-29
Supplement: pone.0297793.s004.pdf [file pone.0297793.s004.pdf]

## *Supplementary Material*

**S1 Table. Baseline and CMR characteristics and follow-up.**

| <b>Supplementary Table 1</b> |                              |                           |                                |                                             |                          |                |
|------------------------------|------------------------------|---------------------------|--------------------------------|---------------------------------------------|--------------------------|----------------|
| <b>Variable</b>              | <b>Overall<br/>(n = 154)</b> | <b>Train<br/>(n = 76)</b> | <b>Validation<br/>(n = 32)</b> | <b>Train +<br/>Validation<br/>(n = 108)</b> | <b>Test<br/>(n = 46)</b> | <b>p-value</b> |
| <b>Medication use</b>        |                              |                           |                                |                                             |                          |                |
| ACE inhibitor, n (%)         | 123(84)                      | 62(90)                    | 24(75)                         | 86(85)                                      | 37(82)                   | 0.147          |
| ARB, n (%)                   | 14(10)                       | 4(6)                      | 5(16)                          | 9(9)                                        | 5(11)                    | 0.283          |
| B-blocker, n (%)             | 138(94)                      | 66(96)                    | 28(87)                         | 94(93)                                      | 44(98)                   | 0.126          |
| CCB                          |                              |                           |                                |                                             |                          | 0.673          |
| Non-dihydropyridine, n (%)   | 2(1)                         | 1(1)                      | 1(3)                           | 2(2)                                        | -                        |                |
| Dihydropyridine, n (%)       | 7(5)                         | 2(3)                      | 2(6)                           | 4(4)                                        | 3(7)                     |                |
| MRA, n (%)                   | 81(55)                       | 34(49)                    | 22(69)                         | 57(56)                                      | 25(56)                   | 0.107          |
| Sacubitril, n (%)            | 3(2)                         | 1(1)                      | 1(3)                           | 2(2)                                        | 1(2)                     | 0.860          |
| Loop diuretics, n (%)        | 102(70)                      | 48(70)                    | 27(84)                         | 75(74)                                      | 27(60)                   | 0.071          |
| Digoxin, n (%)               | 13(9)                        | 3(4)                      | 6(19)                          | 9(9)                                        | 4(9)                     | 0.058          |
| Amiodarone, n (%)            | 42(29)                       | 17(25)                    | 13(41)                         | 30(30)                                      | 12(27)                   | 0.238          |
| Ivabradine, n (%)            | 8(5)                         | 2(3)                      | 4(12)                          | 6(6)                                        | 2(4)                     | 0.138          |

|                           |              |              |              |              |              |       |
|---------------------------|--------------|--------------|--------------|--------------|--------------|-------|
| Lipid-lowering, n (%)     | 40(27)       | 20(29)       | 7(22)        | 27(27)       | 13(29)       | 0.730 |
| <b>CMR measurements</b>   |              |              |              |              |              |       |
| LVEDVi, ml/m <sup>2</sup> | 139(112-171) | 135(113-174) | 145(119-190) | 135(114-182) | 145(109-170) | 0.213 |
| LVESVi, ml/m <sup>2</sup> | 97(79-132)   | 95(70-138)   | 99(85-152)   | 95(79-140)   | 102(80-119)  | 0.211 |
| LVEF, %                   | 27(20-35)    | 26(20-38)    | 25(18-32)    | 26(19-34)    | 27(22-35)    | 0.509 |
| RVEDVi, ml/m <sup>2</sup> | 56(48-80)    | 59(47-79)    | 59(47-86)    | 59(48-80)    | 56(48-77)    | 0.221 |
| RVVTSi, ml/m <sup>2</sup> | 30(20-40)    | 28(19-42)    | 32(20-45)    | 30(19-43)    | 31(22-36)    | 0.089 |
| RVEF, %                   | 50(43-59)    | 52(46-60)    | 46(37-59)    | 51(42-60)    | 50(45-57)    | 0.101 |
| <b>Follow-up</b>          |              |              |              |              |              |       |
| Median time, y            | 6.0(3.5-8.8) | 7.4(3.8-9.9) | 4.9(2.2-7.3) | 6.3(3.7-9.2) | 5.2(2.6-8.4) | 0.752 |
| CRT, n (%)                | 26(19)       | 14(20)       | 6(23)        | 20(20)       | 6(15)        | 0.761 |
| ICD, n (%)                | 70(45)       | 36(47)       | 13(41)       | 49(45)       | 21(46)       | 0.813 |
| All cause death, n (%)    | 12(8)        | 5(7)         | 3(9)         | 8(7)         | 4(9)         | 0.602 |
| VAD implantation, n (%)   | 1(1)         | -            | 1(1)         | 1(1)         | -            | -     |
| Heart transplant, n (%)   | 12(8)        | 8(10)        | -            | 8(7)         | 4(9)         | 0.170 |
| HF hospitalization, n (%) | 36(23)       | 15(20)       | 12(37)       | 27(25)       | 9(20)        | 0.105 |

|            |        |        |       |        |       |       |
|------------|--------|--------|-------|--------|-------|-------|
| 1, n (%)   | 21(14) | 11(14) | 6(19) | 17(16) | 4(9)  |       |
| 2, n (%)   | 7(4)   | 3(4)   | 2(6)  | 5(5)   | 2(4)  |       |
| 3+, n (%)  | 7(4)   | -      | 4(12) | 4(4)   | 3(6)  |       |
| MAE, n (%) | 20(16) | 7(9)   | 7(22) | 14(13) | 6(13) | 0.090 |

ACE: angiotensin-converting enzyme; ARB: angiotensin receptor blocker; CAD: coronary artery disease; CCB: calcium channel blockers CMP: cardiomyopathy; COPD: chronic obstructive pulmonary disease; CRT: cardiac resynchronization therapy; DCM: dilated cardiomyopathy; ECG: electrocardiogram; HF: heart failure; ICD: implantable cardioverter defibrillator; LBBB: left bundle branch block; LVEDVi: left ventricular end-diastolic volume index; LVESVi: left ventricular end-systolic volume index; LVEF: left ventricular ejection fraction; MAE: major arrhythmic event; MRA: mineralcorticoid receptor antagonist; NYHA: New York Heart Association; RVEDVi: right ventricular end-diastolic volume index; RVESVi: right ventricular end-systolic volume index; RVEF: right ventricular ejection fraction; SCD: sudden cardiac death; VAD: ventricular assistant device. Differences between “train”, “validation” and “test” groups were assessed using the Mann-Whitney test for continuous variables and the Pearson chi square test of Fisher exact test for categorical variables. P values < 0.05 were considered statistically significant.
